# Supplementary material for: Reduction of copper oxides by carbon monoxide at an applied potential
Source: Royal Society of Chemistry journal article supplement (doi:10.1039/d3nj02633g), 2023-01-01
Supplement: d3nj02633g1.pdf [file d3nj02633g1.pdf]

## Supplementary Materials

### Reduction of copper oxides by carbon monoxide at applied potential

Nadezhda V. Dokhlikova, Andrey K. Gatin, Sergey Yu. Sarvadii, Sergey A. Ozerin, Vasilii A. Kharitonov, Boris R. Shub, Maxim V. Grishin and Sergey V. Doronin

#### S1. Potential of charged $\text{Cu}_2\text{O}$ and $\text{CuO}$ slabs

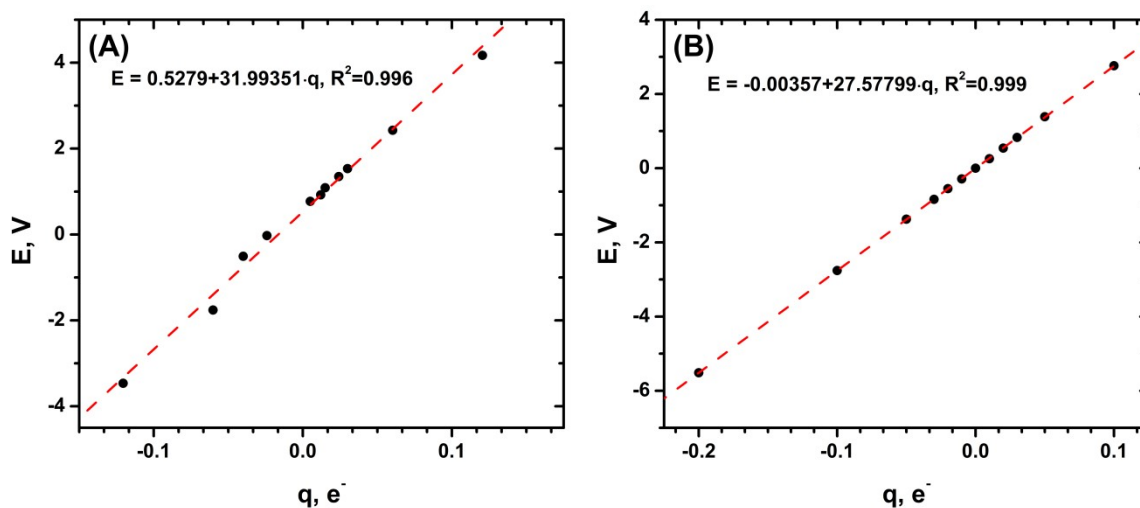

**Fig. S1.** Dependence of the applied potential calculated based on the Fermi level shift on the charge of  $\text{Cu}_2\text{O}$  (A) and  $\text{CuO}$  (Fm3m) (B) slabs.

## S2. DOS of Cu<sub>2</sub>O and CuO allotropes

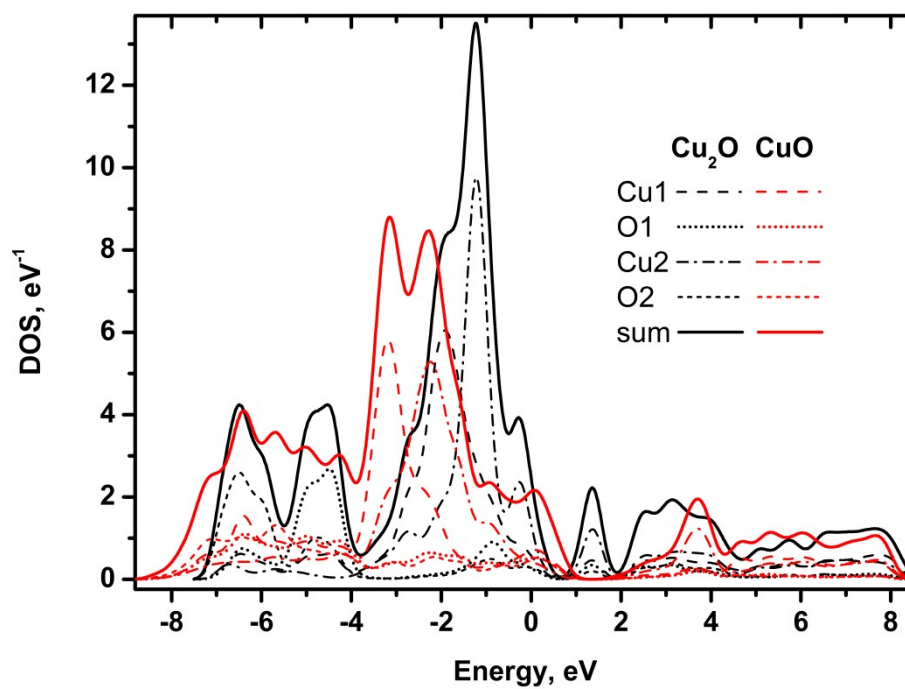

Fig. S2. Partial DOS для Cu<sub>2</sub>O и CuO (Fm3m).

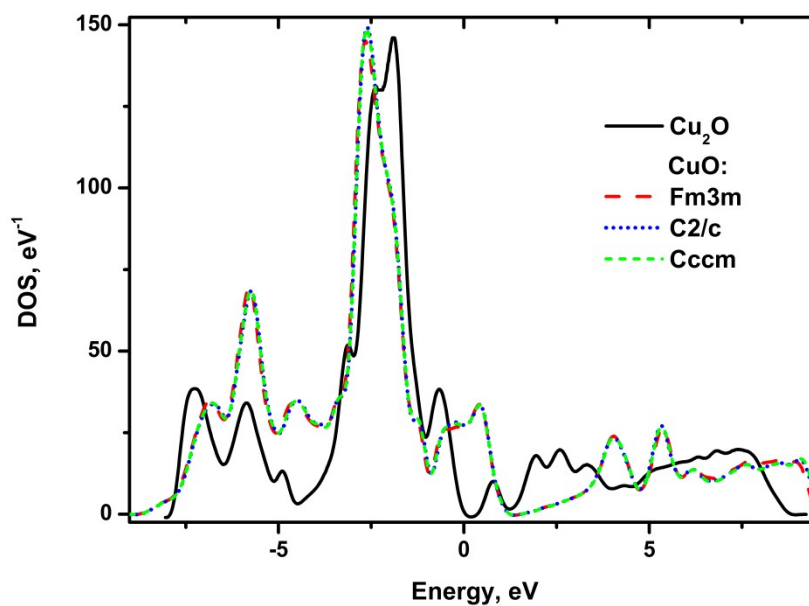

Fig. S3. Total DOS of copper oxides.

### S3. CO interaction with cuprum oxides

**Tab. S1.** Binding energies ( $E_{\text{bind}}$ ) of CO and reduction reaction energy ( $E_{\text{reac}}$ ) on sites (Cu1, Cu2, O1, and O2) of copper oxides ( $\text{Cu}_2\text{O}$  and CuO Fm3m, C2/c, and Cccm).

| Oxide                 | E, V | Cu1               |                    |                    | Cu2               |                    |                    | O1                |                    |                    | O2                |                    |                    |
|-----------------------|------|-------------------|--------------------|--------------------|-------------------|--------------------|--------------------|-------------------|--------------------|--------------------|-------------------|--------------------|--------------------|
|                       |      | $E_{\text{bind}}$ | $E_{\text{reac1}}$ | $E_{\text{reac2}}$ |
| $\text{Cu}_2\text{O}$ | -1   | -0.574            | 0.567              | 0.693              | -1.825            | -0.684             | -0.558             | -1.492            | -0.351             | -0.225             | -0.469            | 0.672              | 0.798              |
|                       | 0    | -2.308            | -1.011             | -0.891             | -2.268            | -0.970             | -0.851             | -1.404            | -0.107             | 0.013              | -1.000            | 0.298              | 0.417              |
|                       | 1    | -0.576            | 0.566              | 0.683              | -1.785            | -0.643             | -0.526             | -0.275            | 0.868              | 0.984              | -0.461            | 0.682              | 0.798              |
| CuO Fm3m              | -1   | -0.361            | 1.201              | 0.971              | -0.608            | 0.954              | 0.724              | -1.732            | -0.170             | -0.400             | -0.607            | 0.955              | 0.725              |
|                       | 0    | -0.362            | 1.188              | 0.922              | -0.640            | 0.911              | 0.644              | -1.735            | -0.185             | -0.451             | -1.734            | -0.183             | -0.450             |
|                       | 1    | -0.363            | 1.201              | 1.017              | -0.614            | 0.950              | 0.766              | -1.749            | -0.185             | -0.369             | -0.303            | 1.260              | 1.076              |
| C2c                   | -1   | -0.121            | 1.267              | 1.014              | -0.121            | 1.267              | 1.014              | -1.503            | -0.115             | -0.367             | -0.452            | 0.936              | 0.684              |
|                       | 0    | -0.871            | 1.271              | 1.014              | -1.205            | 0.938              | 0.681              | -2.257            | -0.114             | -0.371             | -1.206            | 0.937              | 0.680              |
|                       | 1    | -0.127            | 1.265              | 1.005              | -1.548            | -0.643             | -0.526             | -1.517            | -0.125             | -0.384             | -0.462            | 0.930              | 0.670              |
| Cccm                  | -1   | 0.063             | 1.378              | 1.205              | -0.133            | 1.181              | 1.008              | -1.399            | -0.084             | -0.257             | -0.133            | 1.181              | 1.008              |
|                       | 0    | -0.805            | 0.644              | 0.229              | -1.048            | 0.401              | -0.014             | -2.186            | -0.737             | -1.152             | -1.048            | 0.402              | -0.014             |
|                       | 1    | 0.053             | 1.380              | 1.202              | -0.144            | 1.183              | 1.005              | -1.414            | -0.087             | -0.264             | -0.144            | 1.183              | 1.006              |

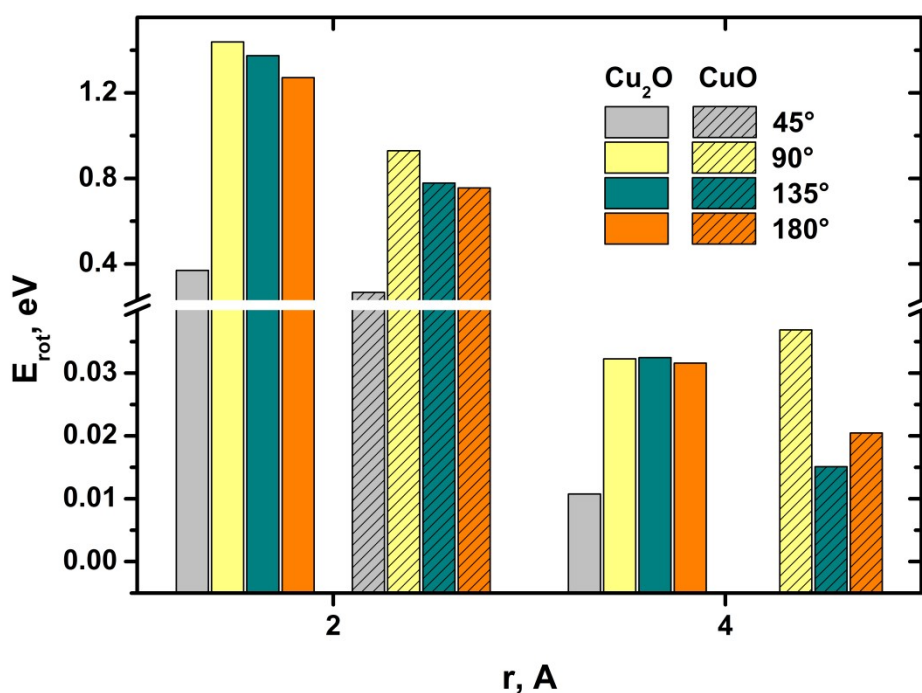

**Fig. S4.** Energies of the CO molecule rotation at distances  $r = 2$  and  $4$  Å from the Cu2 site on the  $\text{Cu}_2\text{O}$  and CuO (Fm3m) surfaces.

**Tab. S2.** Energy of the CO molecule rotation by the angle  $\alpha$  on the copper oxides surface.  $r$  is the distance between the carbon (CO) and Cu2 at  $\alpha < 90^\circ$ , oxygen (CO) and Cu2 at  $\alpha > 90^\circ$ .

| Oxide             | $r, \text{\AA}$ | $E = -1 \text{ V}$  |            |             |             | $E = 0 \text{ V}$ |            |             |             | $E = +1 \text{ V}$ |            |             |             |
|-------------------|-----------------|---------------------|------------|-------------|-------------|-------------------|------------|-------------|-------------|--------------------|------------|-------------|-------------|
|                   |                 | $\alpha = 45^\circ$ | $90^\circ$ | $135^\circ$ | $180^\circ$ | $45^\circ$        | $90^\circ$ | $135^\circ$ | $180^\circ$ | $45^\circ$         | $90^\circ$ | $135^\circ$ | $180^\circ$ |
| Cu <sub>2</sub> O | 2               | 0.369               | 1.436      | 1.357       | 1.253       | 0.370             | 1.438      | 1.375       | 1.271       | 0.370              | 1.441      | 1.378       | 1.275       |
|                   | 4               | 0.009               | 0.026      | 0.022       | 0.019       | 0.011             | 0.032      | 0.032       | 0.032       | 0.013              | 0.038      | 0.042       | 0.043       |
|                   | 6               | -0.0011             | -0.0035    | -0.0080     | -0.0088     | 0.0006            | 0.0021     | 0.0018      | 0.0027      | 0.0022             | 0.0075     | 0.0081      | 0.0133      |
|                   | 8               | -1.70E-03           | -5.29E-03  | -9.75E-03   | -1.04E-02   | -6.35E-05         | 3.68E-04   | -3.05E-05   | 1.04E-03    | 1.51E-03           | 5.71E-03   | 9.04E-03    | 1.16E-02    |
| CuO<br>(Fm3m)     | 2               | 0.261               | 0.925      | 0.774       | 0.755       | 0.267             | 0.930      | 0.778       | 0.755       | 0.273              | 0.935      | 0.783       | 0.755       |
|                   | 4               | -0.007              | 0.034      | 0.011       | 0.015       | -0.006            | 0.037      | 0.015       | 0.020       | -0.005             | 0.040      | 0.020       | 0.026       |
|                   | 6               | -0.0006             | 0.0028     | -0.0021     | -0.0028     | 0.0001            | 0.0052     | 0.0021      | 0.0021      | 0.0008             | 0.0077     | 0.0064      | 0.0071      |
|                   | 8               | -6.90E-05           | -4.96E-04  | -3.37E-03   | -4.72E-03   | 6.17E-04          | 1.88E-03   | 7.56E-04    | 1.44E-04    | 1.37E-03           | 4.42E-03   | 5.04E-03    | 5.12E-03    |

#### S4. Reaction of CO with copper oxides

**Tab. S3.** CO binding energies ( $E_{\text{bind}}$ ) and reduction reaction energy ( $E_{\text{reac}}$ ) on the Cu1, Cu2, O1, and O2 sites of copper oxides (Cu<sub>2</sub>O, CuO Fm3m, C2/c, and Cccm).

| Oxide             | E, V | Cu1               |                    |                    | Cu2               |                    |                    | O1                |                    |                    | O2                |                    |                    |
|-------------------|------|-------------------|--------------------|--------------------|-------------------|--------------------|--------------------|-------------------|--------------------|--------------------|-------------------|--------------------|--------------------|
|                   |      | $E_{\text{bind}}$ | $E_{\text{reac1}}$ | $E_{\text{reac2}}$ |
| Cu <sub>2</sub> O | -1   | -0.574            | 0.567              | 0.693              | -1.825            | -0.684             | -0.558             | -1.492            | -0.351             | -0.225             | -0.469            | 0.672              | 0.798              |
|                   | 0    | -2.308            | -1.011             | -0.891             | -2.268            | -0.970             | -0.851             | -1.404            | -0.107             | 0.013              | -1.000            | 0.298              | 0.417              |
|                   | 1    | -0.576            | 0.566              | 0.683              | -1.785            | -0.643             | -0.526             | -0.275            | 0.868              | 0.984              | -0.461            | 0.682              | 0.798              |
| CuO Fm3m          | -1   | -0.361            | 1.201              | 0.971              | -0.608            | 0.954              | 0.724              | -1.732            | -0.170             | -0.400             | -0.607            | 0.955              | 0.725              |
|                   | 0    | -0.362            | 1.188              | 0.922              | -0.640            | 0.911              | 0.644              | -1.735            | -0.185             | -0.451             | -1.734            | -0.183             | -0.450             |
|                   | 1    | -0.363            | 1.201              | 1.017              | -0.614            | 0.950              | 0.766              | -1.749            | -0.185             | -0.369             | -0.303            | 1.260              | 1.076              |
| C2c               | -1   | -0.121            | 1.267              | 1.014              | -0.121            | 1.267              | 1.014              | -1.503            | -0.115             | -0.367             | -0.452            | 0.936              | 0.684              |
|                   | 0    | -0.871            | 1.271              | 1.014              | -1.205            | 0.938              | 0.681              | -2.257            | -0.114             | -0.371             | -1.206            | 0.937              | 0.680              |
|                   | 1    | -0.127            | 1.265              | 1.005              | -1.548            | -0.643             | -0.526             | -1.517            | -0.125             | -0.384             | -0.462            | 0.930              | 0.670              |
| Cccm              | -1   | 0.063             | 1.378              | 1.205              | -0.133            | 1.181              | 1.008              | -1.399            | -0.084             | -0.257             | -0.133            | 1.181              | 1.008              |
|                   | 0    | -0.805            | 0.644              | 0.229              | -1.048            | 0.401              | -0.014             | -2.186            | -0.737             | -1.152             | -1.048            | 0.402              | -0.014             |
|                   | 1    | 0.053             | 1.380              | 1.202              | -0.144            | 1.183              | 1.005              | -1.414            | -0.087             | -0.264             | -0.144            | 1.183              | 1.006              |

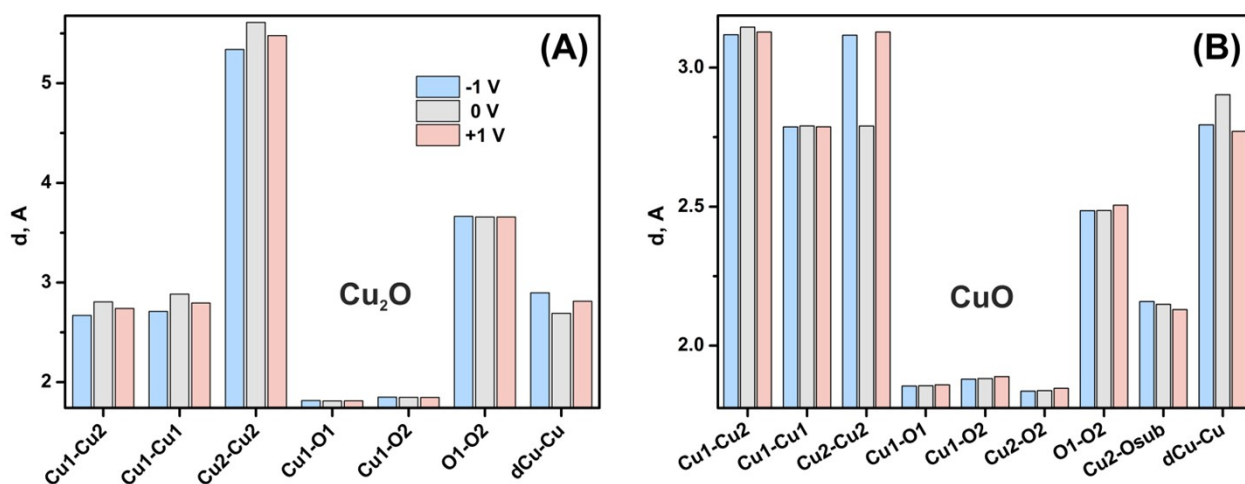

**Fig. S5.** Bond length changes for Cu<sub>2</sub>O (A) and CuO Fm3m (B) copper oxides at potentials  $\pm 1 \text{ V}$ . Notation: O<sub>sub</sub> is the subsurface oxygen lying below O2,  $d_{\text{Cu-Cu}}$  is the distance between the layers formed by the copper atoms; the other designations correspond to **Fig. 1** and **Fig. S6**.

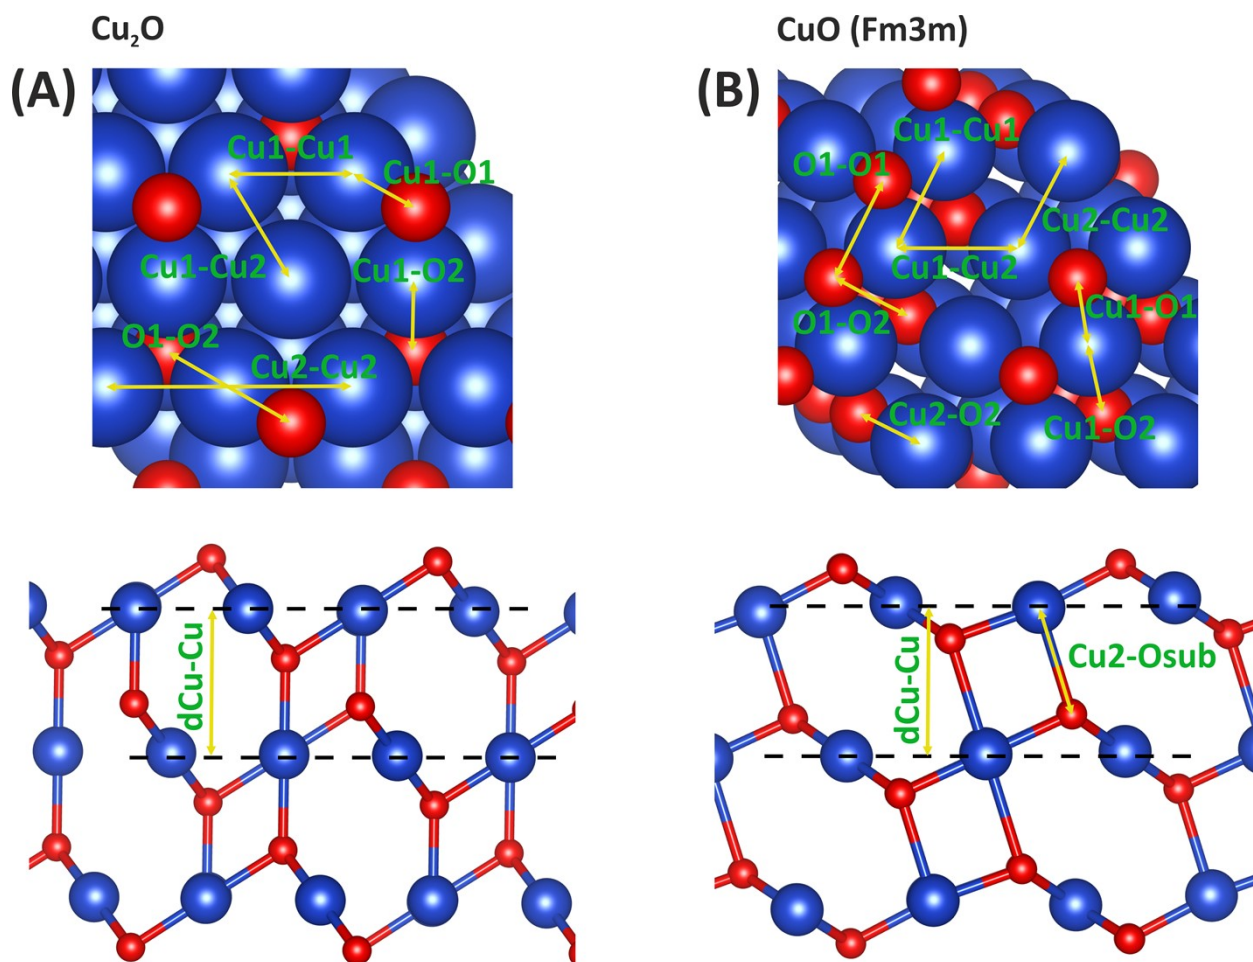

**Fig. S6.** Bonds from **Fig. S5** for Cu<sub>2</sub>O **(A)** and CuO Fm3m **(B)** copper oxides.

**Tab. S4.** Bond length changes for Cu<sub>2</sub>O at potentials  $\pm 1V$ .

|                | Distances, Å |       |       |
|----------------|--------------|-------|-------|
|                | -1 V         | 0 V   | +1 V  |
| <b>Cu1-Cu2</b> | 2.670        | 2.806 | 2.739 |
| <b>Cu1-Cu1</b> | 2.711        | 2.884 | 2.795 |
| <b>Cu2-Cu2</b> | 5.340        | 5.610 | 5.478 |
| <b>Cu1-O1</b>  | 1.815        | 1.811 | 1.812 |
| <b>Cu1-O2</b>  | 1.850        | 1.847 | 1.846 |
| <b>O1-O2</b>   | 3.664        | 3.656 | 3.658 |
| <b>dCu-Cu</b>  | 2.897        | 2.691 | 2.812 |

**Tab. S5.** Bond length changes for CuO Fm3m copper oxides at potentials  $\pm 1V$ .

|                 | Distances, Å |       |       |
|-----------------|--------------|-------|-------|
|                 | -1 V         | 0 V   | +1 V  |
| <b>Cu1-Cu2</b>  | 3.118        | 3.146 | 3.128 |
| <b>Cu1-Cu1</b>  | 2.787        | 2.791 | 2.787 |
| <b>Cu2-Cu2</b>  | 3.117        | 2.790 | 3.128 |
| <b>Cu1-O1</b>   | 1.855        | 1.856 | 1.859 |
| <b>Cu1-O2</b>   | 1.879        | 1.881 | 1.889 |
| <b>Cu2-O2</b>   | 1.836        | 1.839 | 1.847 |
| <b>O1-O2</b>    | 2.486        | 2.486 | 2.505 |
| <b>Cu2-Osub</b> | 2.159        | 2.149 | 2.130 |
| <b>dCu-Cu</b>   | 2.794        | 2.903 | 2.771 |
